# Supplementary material for: Synthesis and characterisation of ionic liquids based on 1-butyl-3-methylimidazolium chloride and MCl4, M = Hf and Zr
Source: Royal Society of Chemistry journal article supplement (doi:10.1039/b919094e), 2009-12-01
Supplement: b919094e.pdf [file b919094e.pdf]

## Electronic Supplementary Information

### Synthesis and Characterisation of Ionic Liquids based on 1-butyl-3-methylimidazolium chloride and $MCl_4$ , $M = Hf$ and $Zr$

Paul S. Campbell<sup>a</sup>, Catherine C. Santini<sup>a\*</sup>, Denis Bouchu<sup>b</sup>, Bernard Fenet<sup>c</sup>, Leszek Rycerz<sup>d</sup>,  
Yves Chauvin<sup>a</sup>, Marcelle Gaune-Escard<sup>c</sup>, Catherine Bessada<sup>f</sup>, Anne-Laure Rollet<sup>f,g</sup>

#### Electrospray Ionisation Spectra

Figure 3

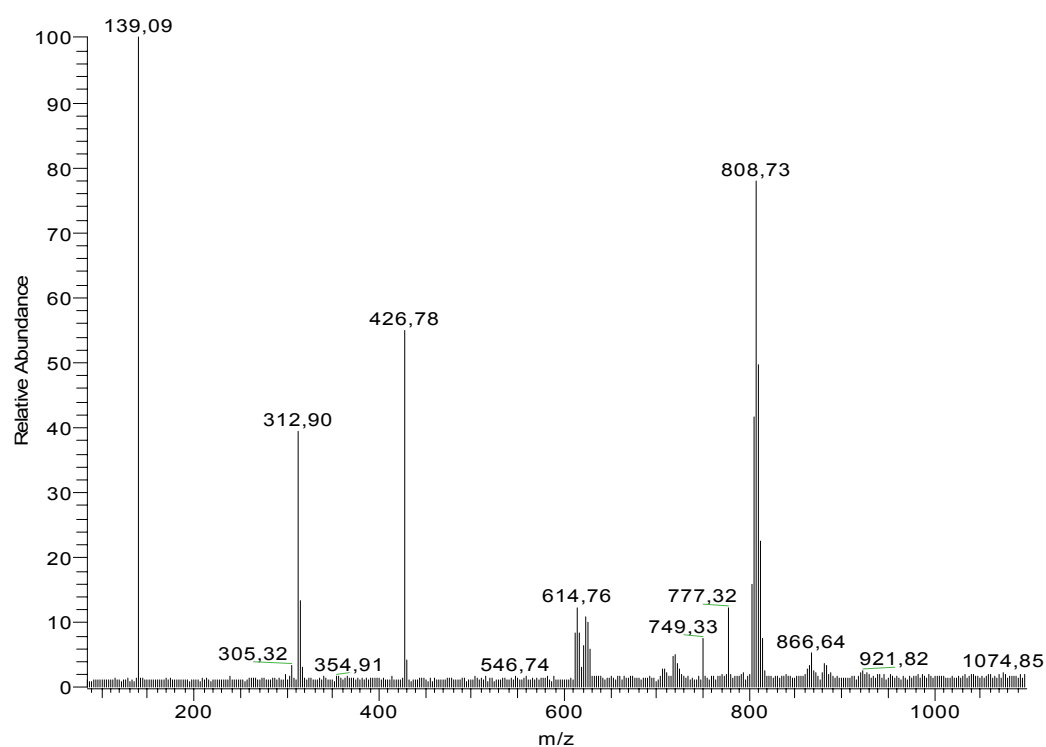

Full spectrum -  $[C_1C_4Im]_2HfCl_6$

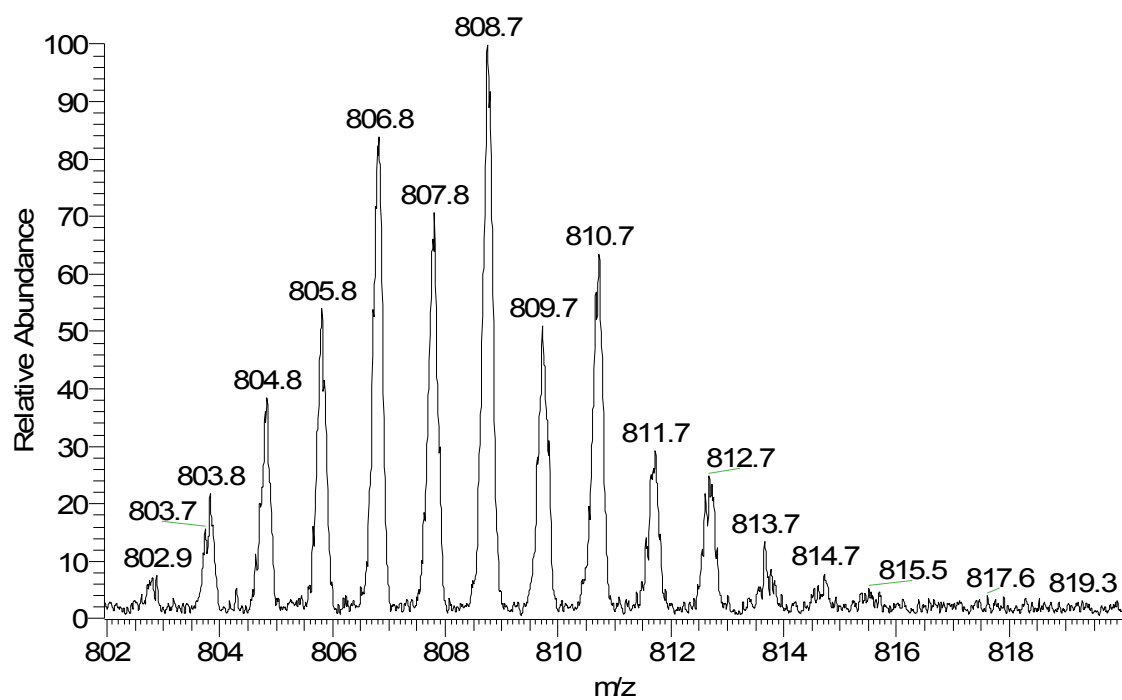

Zoom on  $[(C_1C_4Im)_3HfCl_6]^+$  region showing isotopic peaks

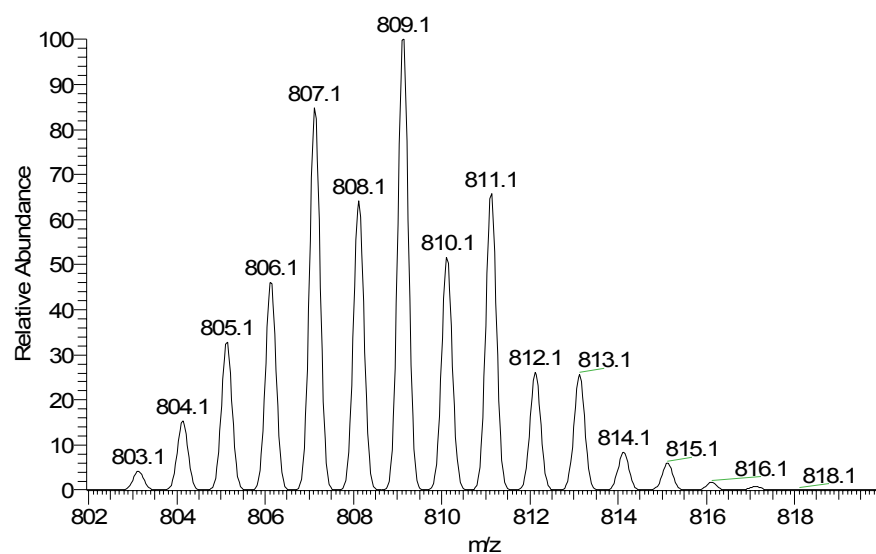

Theoretical simulation of  $[C_1C_4Im_3HfCl_6]^+$  isotopic peaks for comparison

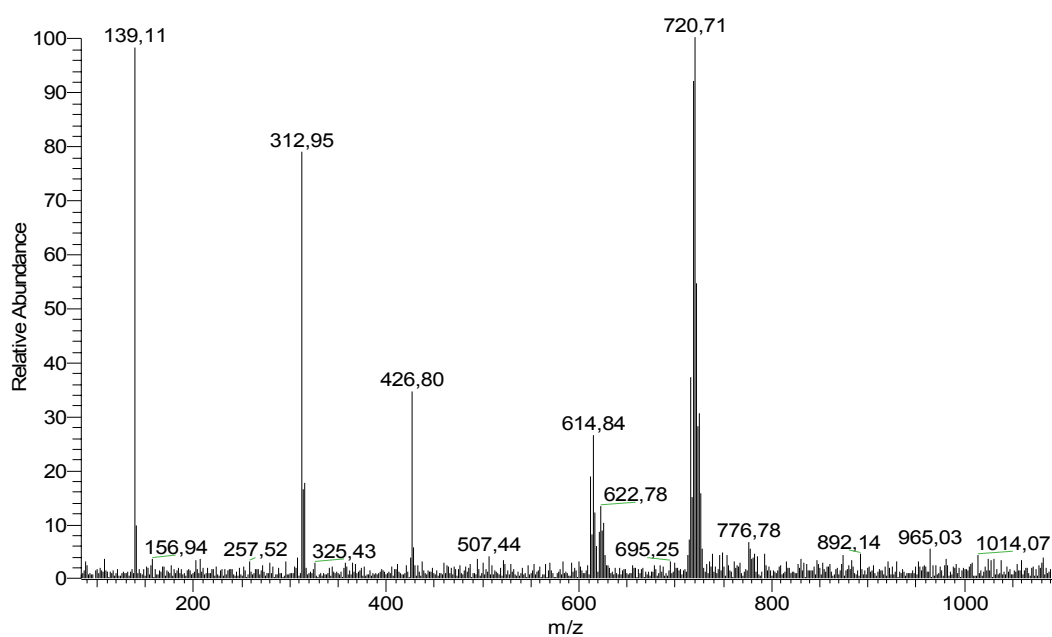

Full spectrum -  $[\text{C}_1\text{C}_4\text{Im}]_2\text{ZrCl}_6$

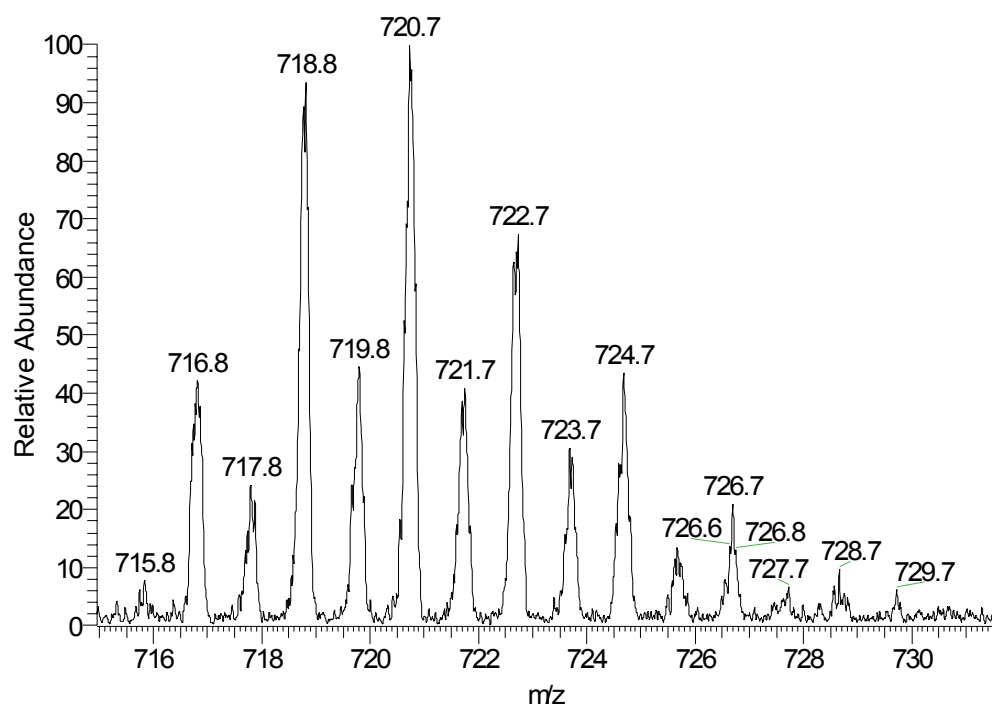

Zoom on  $[(\text{C}_1\text{C}_4\text{Im})_3\text{ZrCl}_6]^+$  region showing isotopic peaks

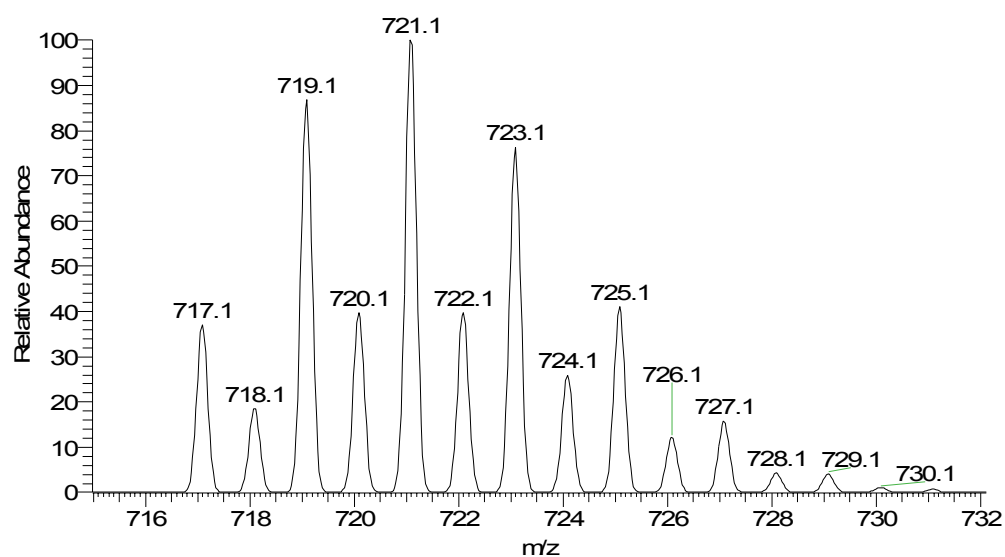

Theoretical simulation of  $[C_1C_4Im_3ZrCl_6]^+$  isotopic peaks for comparison

**Figure 5**

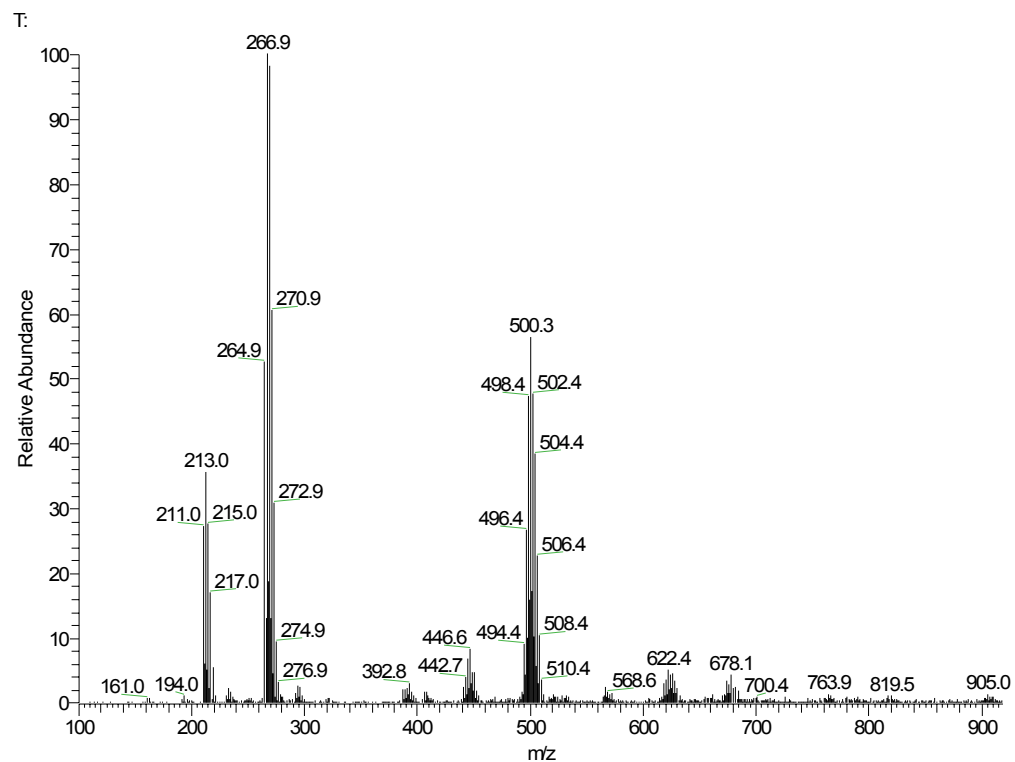

Full ESI- mass spectra of R = 0.67, Hf

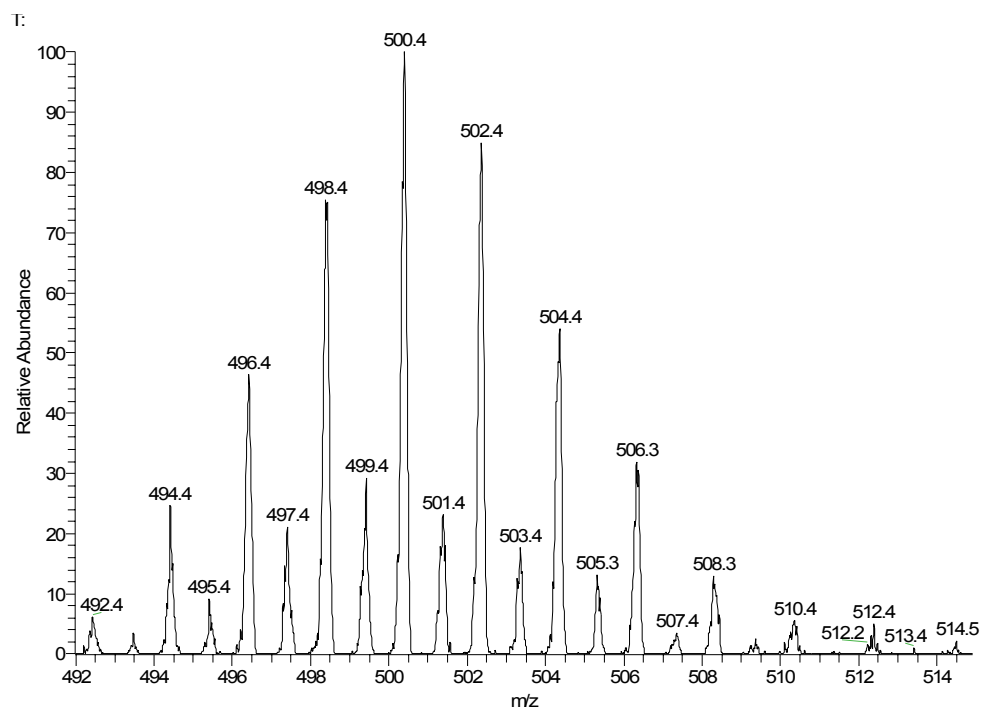

Zoom on  $[\text{Hf}_2\text{Cl}_9]^-$  region showing isotopic peaks

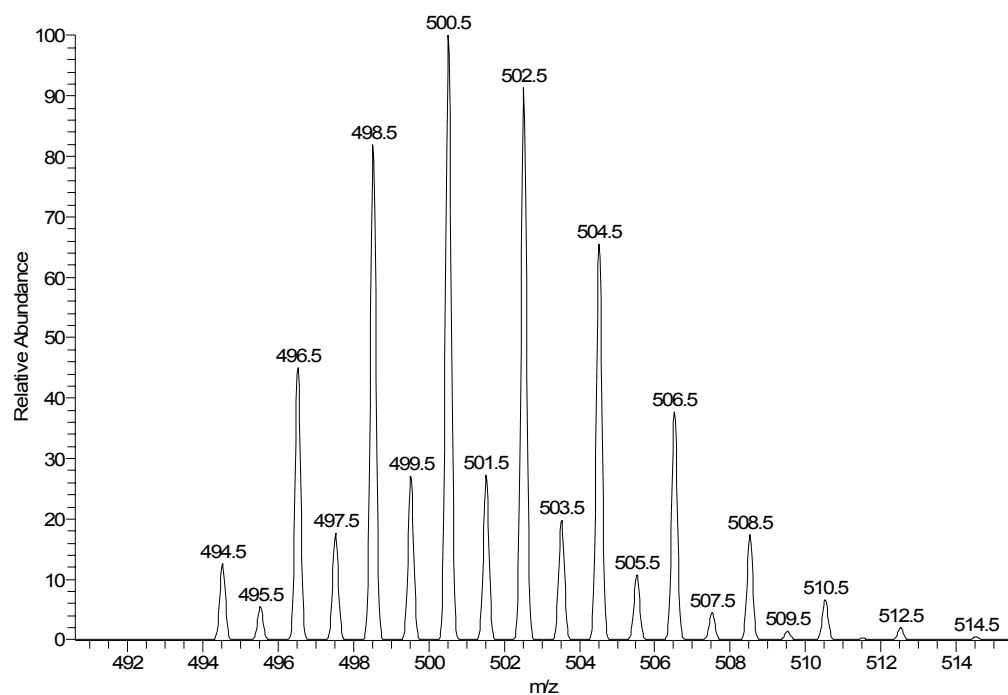

Theoretical simulation of  $[\text{Hf}_2\text{Cl}_9]^-$  isotopic peaks for comparison

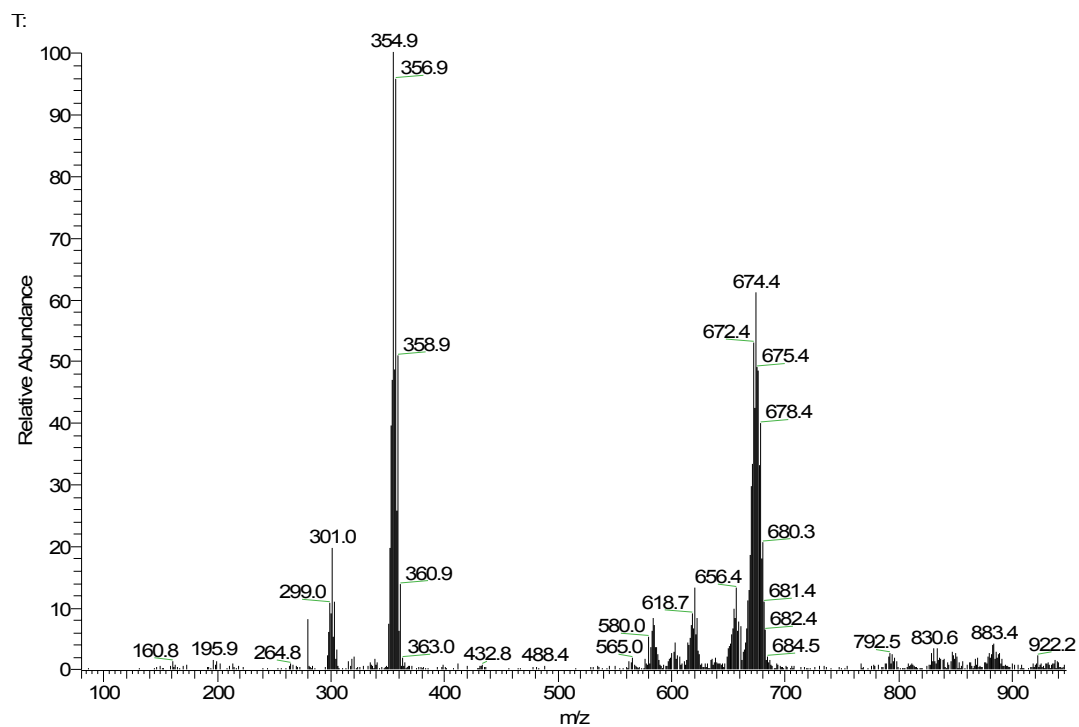

Full ESI- mass spectra of R = 0.67, Zr

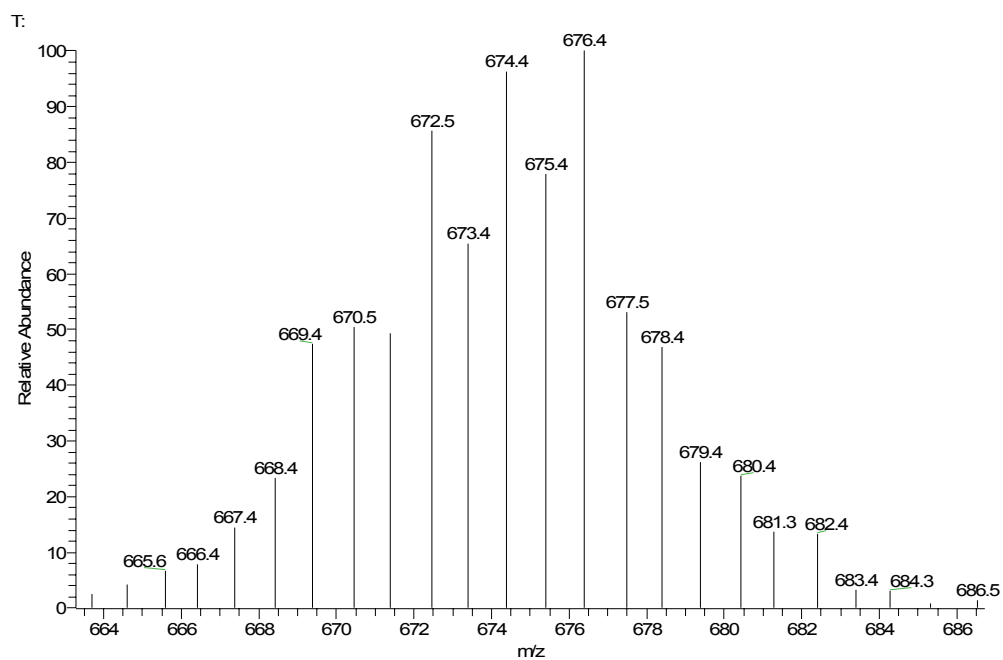

Zoom on  $[\text{Zr}_2\text{Cl}_9]^-$  region showing isotopic peaks

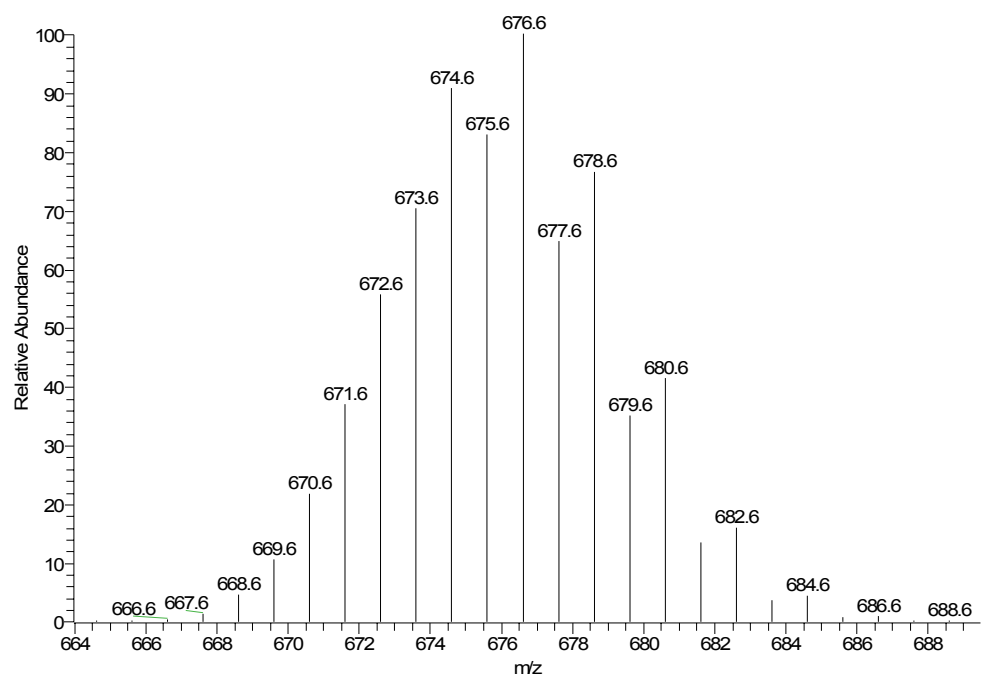

Theoretical simulation of  $[Zr_2Cl_9]^-$  isotopic peaks for comparison
